# Supplementary material for: Prognostic implications of preoperative versus postoperative circulating tumor DNA in surgically resected lung cancer patients: a pilot study
Source: PubMed Central journal article supplement — Transl Lung Cancer Res. 2020 Oct;9(5):1915–23. doi: 10.21037/tlcr-20-505 (PMC7653121; doi:10.21037/tlcr-20-505), 2020-10
Supplement: tlcr-09-05-1915-dss.pdf [file tlcr-09-05-1915-dss.pdf]

## Data Sharing Statement

|                     |                                                                                                                                                     |                                                              |
|---------------------|-----------------------------------------------------------------------------------------------------------------------------------------------------|--------------------------------------------------------------|
| <b>Article Info</b> | <a href="http://dx.doi.org/10.21037/tlcr-20-505">http://dx.doi.org/10.21037/tlcr-20-505</a>                                                         |                                                              |
| <b>Item</b>         | <b>Question</b>                                                                                                                                     | <b>Authors' Response<br/>(place - if not applicable)</b>     |
| 1                   | Would you like to share data collected for your study to others?                                                                                    | I would like to share data collected for my study to others. |
| 2                   | If not, would you like to share the reason for your decision?                                                                                       | -                                                            |
| 3                   | What data in particular will be shared?                                                                                                             | Patients' background and ctDNA data (detected mutations)     |
| 4                   | Any other documents will be shared? Such as study protocol, statistical analysis plan, informed consent form, clinical study report, analytic code. | -                                                            |
| 5                   | When will data availability begin?                                                                                                                  | After publication of this manuscript                         |
| 6                   | When will data availability end?                                                                                                                    | Two years after the publication                              |
| 7                   | To whom will you share the data?                                                                                                                    | Reseachers who provide detailed purpose of their analysis    |
| 8                   | For what type of analysis or purpose?                                                                                                               | No restriction                                               |
| 9                   | How or where can the data/documents be obtained?                                                                                                    | Via e-mail corresponding author                              |
| 10                  | Any other restrictions?                                                                                                                             | -                                                            |
